# Supplementary material
Source: PubMed Central journal article supplement (PMC4433496)

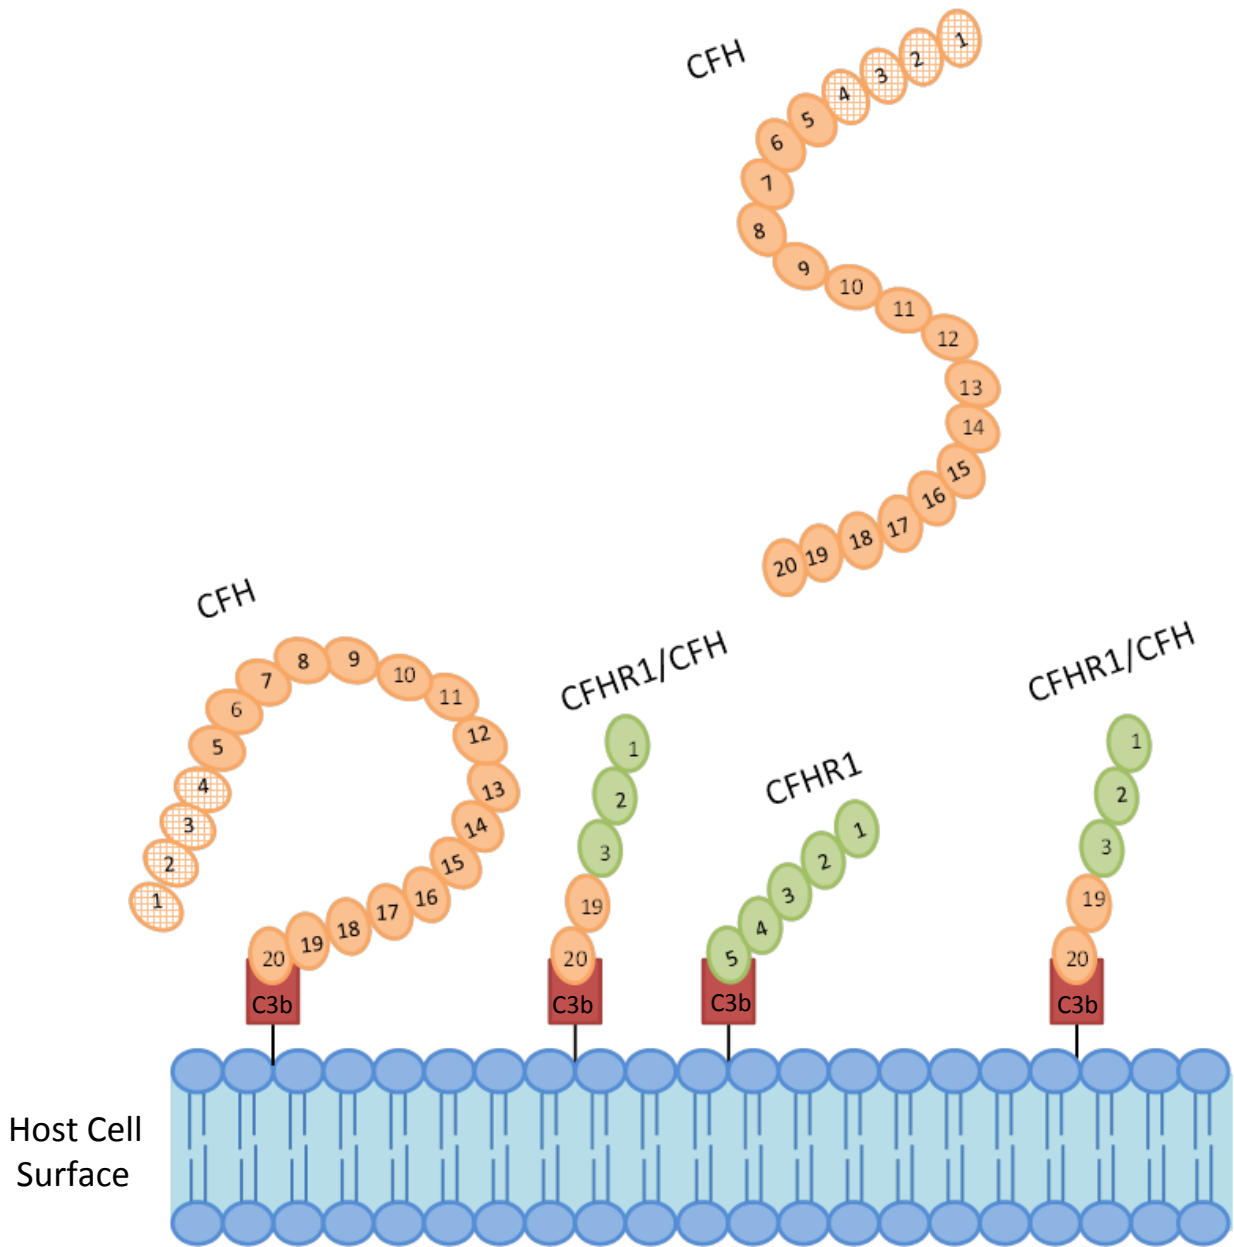

Supplement: NIHMS685837-supplement-S1.pdf [file NIHMS685837-supplement-S1.pdf]
